# Supplementary material
Source: Springer Nature journal article supplement (https://www.springermedizin.de/resource/supplementary/12879_2012_2182_MOESM4_ESM.pdf/9443886)

BD  
 NI  
 XTO

### A) Total

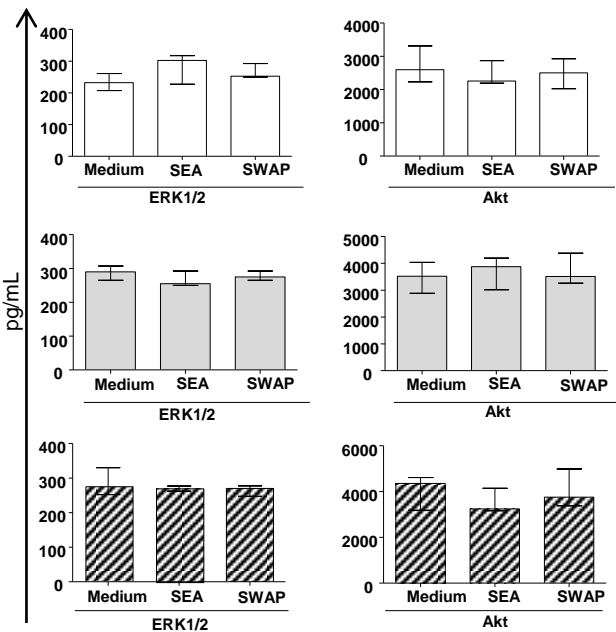

### B) Phosphorylated

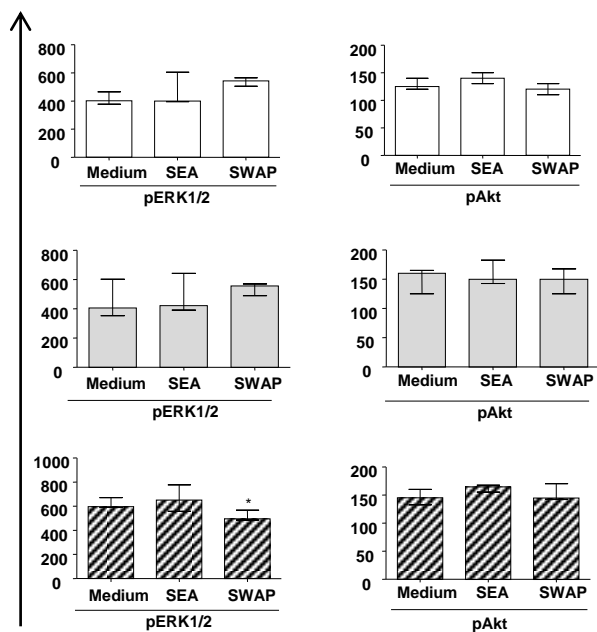

Stimuli

Supplement: MOESM4 [file 9443886]
